# Supplementary material
Source: publisher site journal article supplement (https://www.dovepress.com/article/supplementary_file/618733/618733%20Appendix%20A-D.docx)
Supplement: Supplementary file 1 [file 618733%20Appendix%20A-D.docx]

**Appendix A. Clerkship Syllabus and Learning Objectives.** Document provided to students with learning objectives for the critical care medicine clerkship, site-specific information, and university policies and procedures.

Critical Care Core Clerkship

Syllabus

CLERKSHIP OVERVIEW

Clerkship Description

**Critical Care Core Clerkship**

The Critical Care Core clerkship is a four-week core clerkship introducing medical students to critically ill patients. Students will learn how to optimize care for the acutely ill patient and develop skills using a multidisciplinary approach to complex patients. Care of the critically ill patient involves reviewing basic organ physiology and use of pathophysiologic mechanisms to formulate physiologic and evidence-based treatment plans. The oral presentation during this rotation is a key component of taking care of critically ill patients and communicating medical fund of knowledge to the team. ICU rounds, bedside evaluation and treatments, and individual interactions with attendings, fellows, and residents are part of the educational process of this rotation. Students will gain experience with monitoring devices, mechanical ventilation, and cardiopulmonary resuscitation. The rotation focuses on common critical illness topics such as septic shock, cardiogenic shock, acute respiratory failure, acute kidney injury and electrolyte imbalances. All students will participate in two simulation sessions providing hands-on practice caring for adult and pediatric critically ill patients. The practice of critical care medicine uses a patient-centered and family-centered approach. Students will learn how to work in teams to provide coordination of care in a compassionate way. Death and dying is frequently encountered during this rotation and all students will develop skills to lead family meetings, start difficult conversations, and coordinate end-of-life care. Students will participate in a debriefing session to explore the effects these situations have on them as health-care providers. Students will also have an opportunity to explore social justice topics through case-based Health Equity Rounds pertaining to care in the ICU. This core clerkship is developed to provide students with an opportunity to integrate into a multidisciplinary approach to critically ill patients and develop skills required to care for acutely ill patients.

Absences during the clerkship: Students must contact the Clerkship Coordinator to obtain Director approval for any planned absence from the clerkship. Unanticipated absences for illness or emergency must be communicated to the Clerkship Coordinator, Director, Site Director, and on-service Attending as promptly as possible. Students with more than 2 days of unexcused absences (i.e., 3- 5 days) will be required to make up the days. Arrangements to make up missed time must be made by the student with the Clerkship Coordinator and/or Director. Students who anticipate missing a week (i.e., 5 weekdays) or more of the Clerkship are encouraged to reschedule this clerkship during a different period. Simulation courses are required for completion of the rotation.

Assignments will be made amongst the seven different sites. Student preferences for a particular site will be given consideration but cannot be guaranteed. Please see below for individual site descriptions.

**Academic Medical-Surgical ICU Service**

Students will be exposed to adult critically ill patients with a variety of complex diagnoses. In addition, students will have exposure to stroke patients, neurosurgical patients, pre-liver transplant patients, and critically ill bone marrow transplant patients. Students will have the ability to focus on basic critical care procedures such as IV insertion and arterial line placement. Students are vital members of the code team. This team is staffed with residents, fellows, advanced practice providers (NP/PA), and attendings. Didactic lectures for the team take place on site at 12:30 on Monday, Wednesday, and Friday. No overnight call, Students work 2 weekend days.

**Community Medical-Surgical ICU Service**

Medical Students in this 20-bed ICU will be exposed to a myriad of critically ill medical and surgical patients. Students will be introduced to several ICU procedures through their primary team or the procedure service. Each of the two ICU teams are staffed by an attending, one resident, two interns and 4th year Medical Students. Students are expected to be actively involved in note writing, communication with patients and their families, and treatment plans. In addition to bedside teaching, time is set aside each Thursday afternoon from 12:30PM to 4:30PM for didactic lectures in Internal Medicine. No overnight call, Students work 2 weekend days.

**Surgical ICU Service**

Students will be exposed to adult critically ill and injured patients. Specific learning opportunities involving the care of the trauma patient, post-liver transplant patient, and surgical oncology patient are provided at this site. Students will be a part of the trauma team and learn trauma resuscitation protocols. Opportunities for basic critical care procedures are available. The team is staffed with residents, surgery chief, fellows, and attendings. No overnight call, Students work 2 weekend days.

**Veterans Administration Hospital Medical-Surgical ICU Service**

This 14-bed ICU gives students the opportunity to take care of veteran patients after cardiothoracic surgery, general surgery, as well as medical patients. Students are given the opportunity to perform basic critical care procedures and will have exposure to invasive monitoring devices. Students will be a part of the code and rapid response team. The team is staffed with advanced practice providers, residents, fellows, and attendings. Daily morning lectures for the team take place on site. No overnight call, Students work 2 weekend days.

**Children’s Hospital Pediatric ICU Service**

This busy 20-bed, tertiary care unit will expose students to caring for critically ill children with medical, surgical, and trauma diagnoses. Students will have exposure to solid-organ transplant patients and neurosurgical patients in addition to respiratory failure and patients with shock. The basic differences in both pathophysiology and management of critically ill children as compared to adults will be emphasized at this site. Students will learn to function as a vital team member to provide family-centered care for critically ill and injured children. No overnight call, Students work 2 weekend days.

**Children’s Hospital Neonatal ICU Service**

This site offers an intensive experience in the management of premature and sick term neonates admitted from the delivery room, community physicians’ offices, and through an active referral service. A focus on the delivery room experience and newborn resuscitation, daily management of common newborn problems, and follow-up needs of NICU graduates is provided to students on this rotation. Advanced therapies including mechanical ventilation, extracorporeal membrane oxygenation, nitric oxide therapy, and hypothermia are unique to this site. The basic differences in both pathophysiology and management of critically ill children as compared to adults will be emphasized at this site. No overnight call, Students work 2 weekend days.

**Community Neonatal ICU Service**

This site offers an immersive experience in the care of preterm and sick term neonates admitted from the delivery room, community physicians’ offices, and well-baby nursery where students will work side-by-side with attending physicians in a unique setting where community meets academics. Students will have the opportunity to perform newborn resuscitation in the delivery room, manage common premature infant diagnoses daily, and plan and prepare patients for discharge with the unique follow-up needs of NICU graduates in mind. Advanced therapies such as mechanical ventilation (including high frequency oscillatory ventilation (HFOV) and neurally adjusted ventilatory assist (NAVA) modes) and inhaled nitric oxide are additional experiences available to students at this site. There will be an emphasis on the differences in both physiology and pathophysiology of critically ill neonates (preterm and term) as compared to older children and adults. No overnight call, Students work 2 weekend days.

**CRITICAL CARE CLERKSHIP COMPETENCIES AND OBJECTIVES FOR MEDICAL STUDENT EDUCATION**

**PATIENT CARE**

- Perform a history and physical exam appropriate for the ICU patient population at the assigned rotation site.
- Synthesize clinical findings and patient data to develop an appropriate differential diagnosis - with a corresponding diagnostic and therapeutic strategy prioritized according to the acuity of the patient's problems.
- Interpret and analyze large amounts of clinical data generated on critically ill patients.
- Formulate an initial treatment plan. Evaluate the effectiveness of treatment strategies in critically ill patients, and to propose alternative treatment strategies, if necessary.
- Outline indications, techniques, and complications for invasive procedures commonly performed in ICU patients (e.g., central venous access, arterial pressure monitors, endotracheal intubation/tracheostomies, chest tubes).
- Organize and prioritize responsibilities to provide care that is safe, effective and efficient
- Demonstrate proper verbal techniques for transfer of care both within and between services. Demonstrate proper written techniques in the form of a transfer summary note for transfer to care to another service.

**KNOWLEDGE FOR PRACTICE**

- Recognize and understand the basic pathophysiologic principles of critical illness and injury.
- For each problem or diagnosis listed in the site-specific core topics list, summarize essential clinical features and essential elements of diagnosis and management.

**PRACTICE-BASED LEARNING AND IMPROVEMENT**

- Identify and engage in learning activities to address gaps in one's knowledge, skills, or attitudes.
- Incorporate feedback into daily practice.
- Incorporate information from reference resources and clinical studies in developing evaluation and treatment plans.
- Incorporate information from references and evidence-based guidelines into daily presentations during teaching rounds to provide learning opportunities to all team members.

**INTERPERSONAL COMMUNICATION**

- Establish a rapport in a short time span with patient and family and demonstrate attentive listening to patient and family concerns. Explore patients’ personal history, context, and perspective on illness.
- Recognize the need for foreign language interpretation.
- Having interviewed and examined a patient, make an efficient oral presentation and write notes with a problem-based focus.
- Create complete, accurate, and well-organized electronic progress notes and history and physical notes that reflect problem-based organization.
- Demonstrate the practice of compassionate care in relation to implementing “Do Not Resuscitate” orders, withdrawing or withholding life sustaining therapies, and clarifying goals of care from advance directives or family meetings.
- Attend clerkship debriefing session (“Debriefing Death in the ICU”) and participate in discussion regarding the emotions involved in caring for dying patients.

**PROFESSIONALISM**

- Demonstrate compassion, integrity, and respect for others.
- Demonstrate responsiveness to patient needs that supersedes self-interest.
- Demonstrate respect for patient privacy and autonomy.
- Demonstrate accountability to patients, society and the profession.
- Demonstrate compassion, respect, and caring, with sensitivity for cultural differences in interactions with ICU patients and their families.

**SYSTEMS-BASED PRACTICE**

- Work effectively in a team setting to provide critical care services within and outside of the Intensive Care Unit. (e.g. ER, Outdoor setting, PACU)
- Discuss cost-effectiveness of care for critically ill patients.
- Describe barriers to incorporation of evidence-based practices into patient care.

**INTERPROFESSIONAL COLLABORATION**

- Demonstrate an attitude of teamwork, cooperation, and collaboration with all members of the interdisciplinary ICU Team.

**PERSONAL AND PROFESSIONAL DEVELOPMENT**

- Use self-awareness of knowledge, skills and emotional limitations to engage in appropriate help-seeking behaviors.
- Manage conflict between personal and professional responsibilities.

**DIVERSITY, EQUITY & INCLUSION AND SOCIAL DETERMINANTS OF HEALTH**

**Demonstrate acumen for how DEI and SDH impact delivery and access of care within the greater healthcare systems for a diverse patient populations.**

- Exhibit awareness and sensitivity to social determinant of health and the wide-ranging impact on the health needs and disparities in access among different patient populations.
- Obtain and utilize information about individual patients, populations of patients, or communities from which patients are drawn to provide improved care.
- Attends to patients’ perspectives by inquiring about their social context, and how they understand and experience illness.
- Incorporate knowledge of structural inequalities in access to and outcomes of health care, including an understanding of current and historical factors, to improve the health of patients as well as communities.

Required Materials

- An Organ System-Based Tour of Critical Care Topics, didactic syllabus

**Patient Case Log Diagnosis List and Instructions**

Patient Case Log Diagnosis List:

**PATIENT LOG DIAGNOSIS AND PROCEDURE LIST:**

**Critical Care**

| Logged (E*Value) | Clinical Experience** | *Minimum # of patients to be seen for this diagnosis | Required minimum level of involvement |
| --- | --- | --- | --- |
|  | Respiratory Failure Requiring Mechanical Ventilation | 1 | Direct |
|  | Shock requiring inotropes | 1 | Direct |
|  | Nutritional Assessment: Enteral versus Parenteral | 1 | Direct |
|  | Neurological evaluation for altered mental status (eg, lethargy, agitation, delirium) | 1 | Direct |
|  | Glucose management for hyperglycemia or hypoglycemia | 1 | Direct |
|  | Care of a patient with Sepsis (SIRS, sepsis, severe sepsis, or septic shock) | 1 | Direct |
|  | Care of an immunocompromised patient (cancer, post-transplant, HIV) | 1 | OBS |
|  | Observation of a code blue (in situ or simulation) | 1 | OBS or SIM |
|  | Procedure | Min # | Level |
|  | Central Line Placement | 1 | OBS/ SIM |
|  | Arterial Line Placement | 1 | OBS/SIM |
|  | Intraosseous Placement (in ICU or simulation) | 1 | OBS/SIM |
|  | Endotracheal intubation | 1 | OBS/SIM |
|  | Bag-Valve-Mask Ventilation | 1 | OBS/SIM |
|  | Interpersonal Communication | Min # | Level |
|  | Observation of a family meeting/conference | 1 | OBS |
|  | Observation of informed consent | 1 | OBS/SIM |
|  | Write In (Patients that you present on rounds, examine, or have a significant role in their care) | 5*** | Direct |
|  | TOTAL MINIMUM ENTRIES FOR CLERKSHIP | 20 |  |

**Levels of Involvement: In order of preference (please attempt to obtain the highest level of involvement if possible)**

**Direct = Direct patient care** = participation in History-taking, Physical exam, and/or Clinical Decision-Making (formulation of assessment and plan, presentation, notes, practical management of patient care).

**OBS** = observation, case discussion (on rounds regarding a patient on the team but are not the primary provider; includes discussion at case conferences, M&M, and death and debriefing session).

**SIM =** Simulation = Experience provided through simulation event (Pediatric simulator session, Adult simulator session, or site specific simulation programs).

Didactic/Training Sessions

Every Wednesday after rounds is dedicated for Academic time (including required didactic sessions). Students are excused after rounds or by noon (whichever is earlier) each Wednesday to attend required educational sessions, self-study, complete assignments, etc.

Rotating clerkship students are welcome to join resident and fellow lectures available at each site, please see site description in Canvas or check with your team for the most recent schedule.

SCHOOL OF MEDICINE POLICIES

The Policies below have been included for your reference.

**Definition of Medical Student Practice Role**

California state law allows specific exceptions for medical students to the general code, which requires that all medical acts must be performed by licensed physicians. The exception specifies that a student may do all things that a physician may do with the following provisos:

1. That any medically-related activity performed by students be part of the course of study of an approved medical school; and
2. That any medically-related activity performed by students be under the proper direction and supervision of the faculty of an approved medical school.
3. Where clinically and educationally appropriate, physicians who are supervising medical students may delegate responsibility for some elements of teaching and supervision to non-physician care providers, e.g. allied health professionals, nurses, respiratory therapists, etc. within the institution.  It will be the responsibility of each supervising physician to determine which learning experiences are appropriately delegated in this manner and to ensure that non-physicians providing such supervision are working within their scope of practice.

Medical students may therefore write orders for drugs, treatments, etc., provided that:

1. the provisions of number 2 above are observed;
2. the students are assigned to or are consultants to the service on which the order pertains; and
3. a licensed physician countersigns all orders before the orders are executed. Telephone orders of countersignatures will be accepted from licensed physicians (including licensed house staff). Medical students may locate and solicit the licensed physician’s verification by telephone, but the licensed physician must speak directly to the registered nurse and must actually sign the order before going off duty. The counter-signature is recorded as a telephone order. Routine admission orders are not exempted from the above provisions.

Medical students acting as sub interns, are still subject to the above provisions.

Medical students will identify their signatures with CC (Clinical Clerk) or MS (Medical Student), just as licensed physicians identify their signatures with MD. Medical students will also wear badges identifying them as medical students.

Medical students are not to be involved in any portion of the medical care of other medical students.

**Respectful Educator and Mistreatment Policy**

Fostering a Respectful Learning Environment -Information Sheet for Reporting Concerns of Mistreatment

What is the Respectful Educator and Mistreatment Policy?

The School of Medicine is committed to providing a work and educational environment that is conducive to teaching and learning, research, the practice of medicine and patient care.  This includes a shared commitment among all members of the School of Medicine community to respect each person's worth and dignity, and to contribute to a positive learning environment where medical students are enabled and encouraged to excel.

The **Respectful Educator and Student Mistreatment Policy**

We have the following reporting mechanisms in place should you experience or witness mistreatment in the clinic, the classroom, or a laboratory setting.

- Contact Respectful Environment and Mistreatment Committee Chair to confidentially discuss a plan of action
- Report on the end-of-course or clerkship evaluation

The School of Medicine has an Ombudsperson. The Ombudsperson provides a neutral, confidential and independent resource for dispute resolution for faculty, residents, postdoctoral scholars and students. The ombudsperson assists members of the School of Medicine community with any work related difficulty, including interpersonal conflict or misunderstandings, as well as academic or administrative concerns.

**Disability Access Information:**

Students who may need an academic accommodation based on the impact of a disability must initiate the request with the Office of Accessible Education (OAE). Professional staff will evaluate the request with required documentation, recommend reasonable accommodations, and prepare an Accommodation Letter for faculty dated in the current quarter in which the request is being made. Students should contact the director of Disability Resources to coordinate accommodations.

Please let the clerkship coordinator know prior to the beginning of the clerkship if any special accommodations are needed for access or in order to provide the appropriate amount of time for taking the final exam.

**Student Duty Hours and the Work Environment**

Providing students with a sound academic and clinical education must be carefully planned and balanced with concerns for patient safety and student well-being.

Supervision of students

All patient care must be supervised by qualified physicians or non-physician designees operating within their scope of practice.

Faculty, residents and students must be educated to recognize the signs of fatigue, and adopt and apply policies to prevent and counteract the potential negative effects.

Duty hours

Duty hours are defined as all clinical and academic activities related to the students, i.e., patient care (both inpatient and outpatient), administrative duties related to patient care, the provision for transfer of patient care, time spent in-house during call activities, and scheduled academic activities such as conferences. Duty hours do not include reading and preparation time spent away from the duty site.

Duty hours must be limited to 80 hours per week, averaged over a four-week period, inclusive of all in-house call activities.

Students must be provided with one day in seven free from all educational and clinical responsibilities, averaged over a four-week period, inclusive of call. One day is defined as one continuous 24-hour period free from all clinical, academic, and administrative activities.

In-house call activities

The objective of all call activities is to provide students with continuity of patient care experiences throughout a 24-hour period. In-house call is defined as those duty hours beyond the normal workday when students are required to be immediately available in the assigned institution.

In-house call must occur no more frequently than every third night, averaged over a four-week period.

Continuous on-site duty, including in-house call, must not exceed 24 consecutive hours.

Students must have a minimum of 8-hours free of duty between scheduled duty

periods. Students must have a minimum of 14-hours free of duty after 24-hours of in-house duty.

**Absences During Clerkships**

Students must contact the clerkship director to obtain explicit advance approval for any planned absence from the clerkship. Unanticipated absences for illness or emergency must be communicated to the clerkship director as promptly as possible.

Students are expected to seek necessary health care to maintain their physical and mental well-being. Examples of necessary health care include preventive health services and screening (e.g., annual check-ups, routine dental cleaning, vaccinations), new and follow-up visits for acute illness, ongoing care for chronic illnesses, physical therapy, and counseling and psychological services. Students have a right to privacy when seeking care.

For planned absences related to healthcare, students must contact the clerkship director, site director, and preceptor or patient care team in advance to coordinate time away from the clerkship.  Students need not disclose the specific type of healthcare that is being sought. A student’s decision to seek healthcare during a clerkship should be managed so as to have no impact on his or her performance evaluation.

Students who are absent more than two days during a four or six-week rotation or more than three days during an eight-week rotation for any reason will be required to make up missed time.

Students who will miss more than 20% of the total duration of a clerkship (5-6 days) for any reason will be asked to reschedule the clerkship.

Students may attend recurring medical or dental appointments during core clerkships. Clerkship director/s, site director/s, and preceptor/s or patient care teams (depending on the service) must be notified in advance of these planned absences to coordinate time away from the clerkship. Clerkship students have a right to privacy when seeking care and need not disclose the specific type of healthcare that is being sought. A student’s decision to seek healthcare during a clerkship will be managed so as to have no impact on his or her performance evaluation. Any questions or concerns may be addressed to the Assistant Dean for Clerkship Education and/or the Assistant Director of Clerkship Education by email, phone, or in person.

Failure to communicate with the clerkship director about unavoidable absences is a potential reason for failing the clerkship.

**Dress Code**

Any time students see patients; they must adhere to the dress code described below. Dress code guidelines must be followed at all encounters with patients, standardized or real.

- You may wear scrubs on this rotation. If you need assistance obtaining scrubs, please contact the clerkship coordinator or director.
- Wear your nametag in an easily viewable location (collar of coat, top, or dress)
- Do not wear cologne or perfumes
- Tattoos should be covered
- Jewelry should be minimal and understated
- Clothing should not have rips, tears or frayed edges
- Do not expose your midriff
- Clothing should allow for an appropriate range of movement, and should not be flashy or draw attention
- Button-down shirts (with or without ties), professional tops, or blouses should be worn and should avoid low-cut necklines
- Tank tops, T-shirts, and thin or “spaghetti-style” straps on tops are not appropriate.
- Pants, slacks, khakis, skirts, or dresses are appropriate. Legs should be covered to the knee
- Do not wear jeans or shorts
- Dress shoes, low heels, or flats should be worn. Avoid open-toed shoes, flip flops, tennis shoes, or porous shoes

**Protecting Patient Privacy During Clerkships - Practices That Put Confidentiality at Risk:**

The following are examples of situations in which clerkship students might inadvertently violate HIPAA regulations and put Protected Health Information (PHI) at risk.

- Laptop or other device with PHI/access to PHI left in car during on-the-way home trip to grocery store
- Laptop or other device left in an unsecure hospital area while scrubbed in in the operating room – or left in OR or staff break room
- Patient sticker/ chart label left in coat/scrub shirt pocket – taken home/misplaced
- Lab coat pockets with printed patient information left in public area while in OR or at noon conference
- End-of-shift student evaluation forms or other paperwork containing PHI carried home in backpack – left unattended
- Use of new laptop/tablet/mobile phone prior to encryption
- Copies of patient information left on fax or copy machine
- Paper chart left behind in clinic exam room and new patient comes in
- Team rounding list left at nurses’ station in patient care unit – or dropped in hall, parking lot, etc.
- Hard copies of lab data, clinical notes, EKGs, etc. with patient identifiers left in public areas
- Failure to log out of electronic medical record (EMR) system at any workstation or mobile computer
- Student is asked by busy, distracted resident to present a patient case in the elevator “on the fly”
- Team comment in elevator about patient to be seen next
- Clinic door or conference room left open during patient presentations
- Family member stops team member in the hall or cafeteria, potentially prompting public discussion of PHI
- Auto-forwarding text pages with PHI to personal mobile phone
- Personal computer with remote access set to auto-fill EMR passwords
- PHI entered in notes or reflections for patient logs

**Please be vigilant when working with Protected Health Information.**

**Professionalism and Mobile Devices**

Because personal computing devices are becoming more and more portable — laptops, smart phones, USB thumb drives, etc. — securing the sensitive information stored on those devices is more important than ever. And some new laws have been passed, holding the individual personally and fiscally liable in the event of information disclosure. Students are expected to review and follow the policies outlined below:

Mobile Device Management

If you have an iPhone, iPad, or iPod Touch, there's an easy way to set up and maintain proper security practices on your device.

Students may only use School of Medicine course materials as intended for curriculum and course-related purposes. These materials are copyrighted by the University or others. Access to this content is for personal academic study and review purposes only. Unless otherwise stated in writing, students may not share, distribute, modify, transmit, reuse, sell, or disseminate any of this content.

Restricted Data and HIPAA Compliance

Students must protect their laptops, tablets and mobile devices by following mobile device security guidelines (especially by having a security passcode set and encrypting the backup) to protect any Confidential Information that may be accessible on their device. Students must not access or store Prohibited Information on their tablets or mobile devices as they are not intended for the storage of Restricted Information, specifically including Protected Health Information (PHI). Definitions of terms are provided on the website linked above.

Students must respect copyrights and licenses, respect the integrity of computer based information resources and refrain from seeking to gain unauthorized access, and respect the rights of other information resource users.

**Appendix B. Clerkship Educator’s Guidebook.** Document provided to all educators who work with medical students on the Critical Care Clerkship to outline learning objectives, evaluation expectations, and student expectations.

CLERKSHIP EDUCATOR’S

GUIDEBOOK

School of Medicine MD Program

Critical Care Core Clerkship

**MD PROGRAM CURRICULUM**

The MD Program Curriculum builds from a framework that aligns with the Accreditation Council for Graduate Medical Education’s (ACGME) six core competencies and adds Discovery as a seventh competency. Alignment of the schoolwide competencies and objectives with clerkship and session objectives also meets the requirements of the educational standards of the Liaison Committee on Medical Education (LCME)

Critical Care CORE CLERKSHIP OBJECTIVES

**PATIENT CARE**

- Perform a history and physical exam on critically ill patients, appropriate for the ICU patient population at their rotation site
- Demonstrate proper verbal techniques for transfer of care both within and between services; Demonstrate proper written techniques in the form of a transfer summary note for transfer to care to another service
- Demonstrate the ability to incorporate medical equipment (monitors, ultrasound) into the daily practice of medicine
- Formulate an initial treatment plan; Evaluate the effectiveness of treatment strategies in critically ill patients, and to propose alternative treatment strategies, if necessary
- Implement bedside physical exam and data gathering skills to assign patients to an appropriate level of care based on acuity of illness
- Interpret and analyze large amounts of clinical data generated on critically ill patients
- Outline indications, techniques, and complications for invasive procedures commonly performed in ICU patients (e.g., central venous access, arterial pressure monitors, endotracheal intubation/tracheostomies, chest tubes)
- Recognize ongoing medical needs and conditions that require ICU-level of care
- Synthesize clinical findings and patient data to develop an appropriate differential diagnosis - with a corresponding diagnostic and therapeutic strategy prioritized according to the acuity of the patient's problems

**INTERPERSONAL COMMUNICATION**

- Attend clerkship debriefing session and participate in discussion regarding the emotions involved in caring for dying patients
- Create complete, accurate, and well-organized electronic progress notes and history and physical notes that reflect system-based organization
- Demonstrate the practice of compassionate care in relation to implementing “Do Not Resuscitate” orders, withdrawing or withholding life sustaining therapies, and clarifying goals of care from advance directives or family meetings
- Establish a rapport in a short time span with patient and family and demonstrate attentive listening to patient and family concerns; Explore patients’ personal history, context, and perspective on illness
- Demonstrate effective use of the patient or family interview and the medical record to gather and develop a patient history and clinical status to make an efficient oral presentation and write a progress note in a systems-based format
- Recognize the need for foreign language interpretation
- Demonstrate an attitude of teamwork, cooperation, and collaboration with all members of the interdisciplinary ICU Team

**KNOWLEDGE FOR PRACTICE**

- Demonstrate knowledge of the basic pharmacological principles of vasopressors
- Describe barriers to incorporation of evidence-based practices into patient care
- For each problem or diagnosis listed in the critical care core topics list, summarize essential clinical features and essential elements of diagnosis and management
- Recognize and understand the basic pharmacological principles of commonly used medications for pain, anxiety, and sedation in the ICU
- Recognize and understand the basic pathophysiologic principles of critical illness and injury
- Understand the underlying pharmacological principles of medications used to support shock states

**PROFESSIONALISM**

- Demonstrate compassion, integrity, and respect for others
- Demonstrate responsiveness to patient needs that supersedes self-interest
- Demonstrate accountability to patients, society and the profession
- Demonstrate respect for patient privacy and autonomy
- Demonstrate compassion, respect, and caring, with sensitivity for cultural differences in interactions with ICU patients and their families

**INTERPROFESSIONAL COLLABORATION**

- Demonstrate an attitude of teamwork, cooperation, and collaboration with all members of the interdisciplinary ICU Team
- Contribute to a collaborative learning environment which involves helping other team members including peer medical students

**PRACTICE-BASED LEARNING AND IMPROVEMENT**

- Demonstrate dedication to self-learning through timely completion of required didactic assignments
- Identify and engage in learning activities to address gaps in one's knowledge, skills, or attitudes
- Incorporate feedback into daily practice
- Incorporate information from reference resources and clinical studies in developing evaluation and treatment plans
- Incorporate information from references and evidence-based guidelines into daily presentations during teaching rounds to provide learning opportunities to all team members

**SYSTEMS-BASED PRACTICE**

- Discuss cost-effectiveness of care for critically ill patients
- Provide assistance during code blue clinical situations and work as a vital team member during resuscitative efforts
- Demonstrate knowledge of roles of providers in code blue clinical situations
- Work effectively in a team setting to provide critical care services outside of the Intensive Care Unit.  (e.g. ER, Outdoor setting, PACU)

**PERSONAL AND PROFESSIONAL DEVELOPMENT**

- Manage conflict between personal and professional responsibilities
- Use self-awareness of knowledge, skills and emotional limitations to engage in appropriate help-seeking behaviors

PERFORMANCE ASSESSMENT IN REQUIRED CLERKSHIPS

The information that follows provides a brief overview of the performance evaluation system in required clerkships, including the role of residents, fellows, and faculty in evaluating student performance.

The Critical Care Core Clerkship is a four-week clerkship.

EVALUATION ESSENTIALS

- Criterion vs norm-based evaluation
- Clerkship Evaluation Teams
- Role of resident, fellow, faculty, and non-MD evaluators
- Fairness, Accuracy, & Timelines
- Brief interactions

CRITERION VS. NORM-BASED EVALUATION

- Performance evaluation system in required clerkships is criterion-based.
- This is in contrast to a curved or norm-based system, where only a certain proportion of students can earn the top descriptor of performance.
- Students are afforded evaluations in three separate domains: Patient Care, Professionalism and Interpersonal Communication, and Medical Knowledge

PATIENT CARE

- The School of Medicine has adopted the RIME framework (Pangaro, 1999) to describe performance in Patient Care.
- The RIME framework is based on the understanding that students move through a sequence of developmental stages:
- Reporter
- Interpreter
- Manager
- Educator
- Students must function in the Interpreter stage to pass each core clerkship.
- Managers must consistently demonstrate strong Reporting and Interpreting skills.

EXPECTED TRANSITIONS

Core clerkship students are expected to be at least in the Interpreter stage


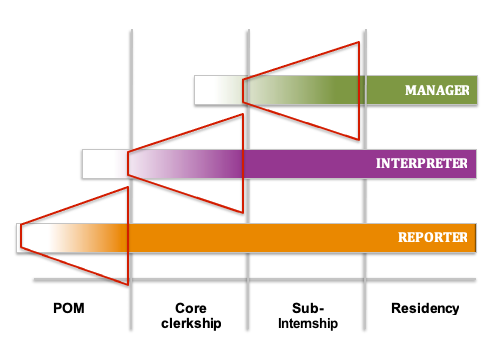


**RIME STAGE DESCRIPTIONS**

Adapted from Pangaro & Holmboe, Evaluation Forms and Global Rating Scales, in Holmboe & Hawkins eds. *Practical Guide to the Evaluation of Clinical Competence*, Mosby 2008 p 40.

**REPORTER**

- Focus at this stage: Reliable, accurate, complete data-gathering and presentation of clinical information
- Emphasis on the S/O (Subjective/Objective) part of SOAP.
- Student is able to answer the “What” questions (What’s the patient’s blood pressure? What medications is he taking? What findings are present on physical exam?)
- Students are expected move through the reporter stage during preclinical training, i.e. Practice of Medicine

**INTERPRETER**

- Focus at this stage: Diagnostic reasoning.
- Emphasis on the A (Assessment) part of SOAP.
- Student can answer the Why questions: e.g. Why does this patient have chest pain? What does this exam finding means?
- Begins to see how details fit together.
- Data-­‐gathering and reporting become more purposeful, more focused on pertinent positive and negative information and exploring diagnostic possibilities.
- Students are expected to move into the interpreter stage during their core clinical training

**MANAGER**

- Focus of this stage: treatment planning -­‐ including diagnostic testing and therapy.
- Emphasis on the P (Plan) in SOAP.
- Student can answer the How or What Next questions: e.g. How do we solve or treat this clinical problem? What do we need to do next for the patient?
- Data-gathering and decision‐making become more flexible, individualized, patient centered. Student thinks critically about recommendations, takes a more sophisticated approach to using medical literature to support patient care.
- Students at the Manager stage take primary responsibility for ensuring patients’ well-­‐being and making sure care plans are carried through. Patients, fellow team members, and staff view the student as patients’ primary provider.
- Students are expected to move into the manager stage at the sub-internship level and beyond.

**EDUCATOR**

At the Educator stage, students:

- Reflect on experiences to identify learning needs
- Define important questions to learn about in more depth
- Takes ownership for self-­ improvement

*Features of the Educator stage are threaded through all other stages.

PROFESSIONALISM AND INTERPERSONAL COMMUNICATION

To earn a Pass for Professionalism and Interpersonal Communication, students must

demonstrate:

- An absence of behavior that raises significant or consistent concerns
- Consistent evidence of acceptable Professionalism and Interpersonal Communication with both patients and the medical team
- Students are highly recommended to request multisource feedback from patients, peers, and non-MD staff to contribute to their evaluation in this domain
- Students are evaluated on professionalism and interpersonal communication skills by direct observation regarding specific behavioral traits. These are listed below, identifying that the student:

| Observed behaviors towards patients: |
| --- |
| Extends him/herself beyond usual duties to ensure patients' comfort or well-being. |
| Advocates respectfully and diplomatically on behalf of patients. |
| Serves as patients' preferred source of information and/or support. |
| Observed behaviors towards the team: |
| Makes an extra effort to support or help fellow students and others excel. |
| Without prompting, takes on extra work to help the team/preceptor. |
| Supports the team by paying attention to the needs and care plans of patients other than those assigned. |
| Observed behaviors towards self-directed learning/growth: |
| Maintains composure and manages conflict in difficult situations. |
| Makes an extra effort to participate in learning opportunities beyond those required. |
| Seeks and responds openly and proactively to feedback. |
| Demonstrates an advanced degree of personal responsibility and accountability– beyond being punctual and reliable. |

CLERKSHIP EVALUATION TEAMS

- Each clerkship has established an Evaluation Team to review student performance data and assign final grades. This consists of the clerkship director and two other faculty at two other sites. The evaluation team includes the clerkship director and all site directors (pediatric, neonatal, surgical, medical, and VA site directors).
- Evaluation Teams are required to submit final grades and evaluations within 4-6 weeks of the end of each rotation. In order to achieve this goal this requires all faculty, residents, fellows, and advanced practice providers to submit their final evaluation within two weeks of working with the student.

ROLE OF RESIDENTS, FELLOWS, ADVANCE PRACTICE PROVIDERS AND FACULTY

- Individual residents, fellows, advance practice providers, and faculty will not be asked to assign final grades.
- The role of each individual evaluator is to:
- Respond promptly to requests for input on student performance
- Describe observations of student performance (examples)
- Provide feedback directly to students on observations of performance

RESPONDING TO REQUESTS FOR INPUT

- Individual clerkships may use any or all of the following mechanisms to gather input on student performance and Critical Care Core Clerkship uses all of these methods:
- Electronic forms
- Paper forms
- Email
- Team meetings

FAIRNESS, ACCURACY AND TIMELINESS

- To ensure that student performance evaluations are as fair and accurate as possible, clerkships must collect information from the full range of residents, fellows, advance practice providers and faculty who work with each student.
- Please respond promptly to clerkship directors’ and coordinators’ requests for information about student performance.

A NOTE ON BRIEF INTERACTIONS

- Q: What if I didn’t have enough contact to decide whether a student functioned as a Manager or demonstrated exceptional professionalism?
- A: Clerkship Evaluation Teams will review and synthesize descriptions of student performance from multiple evaluators. Multiple brief observations from multiple evaluators will fall together as themes and trends. ALL input is valuable.
- Q: How do I best acknowledge above average performance of a medical student in patient care?
- A: Give examples of the superior patient care you saw from the student and how that impacted the patient and/or the team. Do not confuse great medical knowledge to superior patient care. One can happen without the other. Must give a (consistently observed) in the reporter and interpreter questions on the evaluation.
- Q: How do I best acknowledge above average performance of a medical student in professionalism?
- A: Use the grid of suggested observed actions to annotate superior professionalism attributes observed by you. Give examples of what you observed that demonstrated excellence in professionalism.
- Q: How do I give useful feedback to the student?
- A: Give timely, specific, and goal oriented. This is sometimes given raw (without edits) to the student in a formative fashion (only the student and his/her advisor can see this).
- Q: What do I do if I have concerns about a student?
- A: Contact the clerkship director prior to giving feedback to the student

# Appendix C. Clerkship Expectations Form. A form provided to medical students, to be filled between supervising physicians (resident, fellow, attending physician) and medical student to communicate clerkship expectations.

**Clerkship Expectations of Medical Students**

As key members of the learning community, medical students are expected to adhere to the same standards of respectful and professional behavior with all members of the learning environment, including (but not limited to) the standards of conduct set forth in the School of Medicine Professionalism Principles.

During clerkship rotations, students are expected to:

• Demonstrate respect for patients and colleagues.

• Adhere to School of Medicine and Hospital policies.

• Arrive on time and prepared for educational and patient expectations.

• Fulfill obligations, commitments, and assignments in a timely fashion.

• Communicate with their team regarding conflicting responsibilities.

• Take responsibility for shortcomings and areas for improvement.

• Maintain personal control amidst adverse or trying circumstances.

• Take initiative, persevere, and prioritize and to manage time.

• Clarify expectations and clinical responsibilities, including the student’s role on the

team.

• Report accurately and fully on patient care activities.

• Ensure transfer of responsibility for patient care.

• Inform supervisor/team when mistakes occur or when faced with a conflict of

interest.

• Provides constructive feedback to improve instruction.

• Maintain appropriate boundaries in dealing with patients and their families.

• Maintain confidentiality of patients.

In addition, the following will be expected of you during your Critical Care Clerkship:

This template is meant to help set clear expectations for all students on day 1 or 2 with your

ICU team. Please fill out this form with the senior resident/fellow on the team to make

sure your goals and expectations are aligned. If the resident switches, share or repeat with

the new resident.

As a medical student on team ____________, I am expecting to:

WORK HOURS:

____ I will be present at sign out from the overnight team _____ I will be present for rounds, didactic teaching sessions, informal teaching sessions, required clerkship sessions, and patient care activities until sign-out at ______, except for academic days (see below).

____ I will be excused from clinical activities starting after rounds on every Wednesday of the clerkship. I will attend required educational sessions on these days (Health Equity Rounds, Simulations, Debriefing Death and Dying) and will have the rest of the afternoon as academic time for studying, completing assignments, etc.

____ I will be given time for lunch, though the timing may vary based on rotation site and

scheduled didactic teaching

____ I will work Monday-Friday for the four-week rotation and an additional two weekend days during the month. I will notify the clerkship coordinator which weekend days I worked.

____ I am allowed 2 days of absence on this rotation; additional absence(s) will need to be made up. I will notify the clerkship coordinator if I will be absent during my rotation.

PATIENT CARE:

____ I am expected to follow two critically ill patients starting on day 2 or 3 of the clerkship.

____ I am not expected to present any patients on day 1 of the clerkship.

____ I am expected to write a daily progress note for each patient I follow. My resident will need to generate their own note, independent from mine. The specific process for generating medical student notes at my site is:

______________________________________________________________________________

____ I will communicate my learning goals to my team as they evolve to ensure I am exposed to pathology and procedures of particular interest.

I prefer (pick one):

____to pick up new admissions from overnight

____to pick up new admissions during the day

____to examine the patient with the intern/resident

____to examine the patient alone

Readiness for patient care responsibilities:

I feel I have had some preparation for and am ready to perform (circle those that

apply):

*History Physical Exam Presentation on Rounds Writing Notes*

*Calling Consults Updating patients Updating families*

*Updating bedside nurse Devising the plan of care Placing Orders in Epic*

*Code status discussions Serious Illness Conversations*

I feel I have had some preparation but would like to observe more before I am ready

to perform:

*History Physical Exam Presentation on Rounds Writing Notes*

*Calling Consults Updating patients Updating families*

*Updating bedside nurse Devising the plan of care Placing Orders in Epic*

*Code status discussions Serious Illness Conversations*

I am most interested in feedback on the following 3 things:

*History Physical Exam Presentation on Rounds Writing Notes*

*Calling Consults Updating patients Updating families*

*Updating bedside nurse Devising the plan of care Placing Orders in Epic*

*Code status discussions Serious Illness Conversations*

COMMUNICATION:

The best time to get feedback on my performance is _________________________________

The best way to reach my team member is (ex. Pager number, call cell, text cell, Voalte, etc)

____________________________________________________________________________

I have shared the following obligations with my resident:

___ Required teaching sessions

___ Continuity clinic schedule (if applicable)

___ Accommodations (if relevant), and scheduled appointments

Feedback may occur:

o In response to my patient presentations on daily rounds

o In response to the Directly Observed Clinical Skills encounter

o In response to written progress notes

o During mid-clerkship feedback I receive from my attending during week 2.

o In the presence of fellow team members and/or patients as part of the learning

experience

STUDENT’S OBJECTIVES:

The three things that I wish to get out of this experience is:

1) ______________________________________________________________________________

2) ______________________________________________________________________________

3) ______________________________________________________________________________

________________________________ ________________________________

Student Signature Supervising MD Signature

**Appendix D. Learning Objectives for Adult and Pediatric Simulation Programs.** Provides the learning objectives for the adult and pediatric simulation sessions.

**Critical Care Medicine Adult Simulation Course: Learning Objectives and Content Outline**

**Overall Learning Objectives:**

1. Part 1: Vasopressors and Name That Drug Sim
   1. Identify receptor activity of common vasoactive drugs and describe physiologic effects on heart rate, contractility, and systemic vascular resistance
2. Part 2: Respiratory Failure and Barry Sadler Sim
   1. Discuss escalating management approach to hypoxemic and hypercapnic respiratory failure
   2. Name primary causes of hypoxemic respiratory failure
   3. If time:
      1. Describe the differences between basic ventilator settings
3. Part 3: Shock and Pearl Warren Sim
   1. Identify septic shock and discuss goal-directed management
   2. Discuss different forms of shock and differentiate shock states based on hemodynamic data
4. CRM Objectives
   1. Establishing closed-loop communication
   2. Creating a shared mental model for the scenario

**Critical Care Medicine Pediatric Simulation Course: Learning Objectives and Content Outline**

***“Pediatric Sepsis”* Simulation**

**Faculty: Fellow** (in control room)

**Nurse Confederate** (in simulation room)

**Target Learner Groups:** Clinical medical students (MS3+)

**Learning Objectives:**

**A. CRM Objectives**

1) Establishing closed-loop communication

2) Creating a shared mental model for the scenario

**B. Medical Objectives**

1. To recognize age-appropriate vital signs in pediatric patients.
2. To define pediatric sepsis and septic shock.
3. To manage a simulated pediatric sepsis patient within the first hour of presentation.
4. To select appropriate vasopressors for a patient in septic shock.
5. To understand the advantages and disadvantages of types of venous access and practice placing an intraosseous line (IO).

**C. Critical Actions:**

1. Administer supplemental oxygen.
2. Treat fever.
3. Obtain labs and start antibiotics.
4. Administer a fluid bolus and select an appropriate vasoactive.
5. Place an IO.

**Debriefing plan: PEARLS Framework**

**Reactions:** Summarize how you felt managing this patient in one word.

**Facts of the Case:** 4 yo presenting in decompensated septic shock secondary to Influenza A and gram positive bacteremia.

**Discussion**

1. Clinical management: please see attached instructor guide
2. Did the team feel like a cohesive unit today? Were there any challenges to your leadership or communication?

**Summary/Take Home Points**

- Normal vital signs range depending on age and clinical history of patient.
- Shock is defined as insufficient oxygen delivery to meet the body’s demands. Adequate management of shock depends on delivering oxygen and minimizing oxygen demand.
- Within the first hour of sepsis management, manage ABCs and start antibiotics.
- Selection of pressors depends on whether patient is in cold or warm shock. Consider an agent with more alpha activity in warm shock and more beta activity in cold shock.
- IO lines are helpful when difficulty establishing central access, but have significant potential adverse effects and are only temporary solutions – can have bones and drills available during debrief
